# Supplementary material for: Carbon-coated Si micrometer particles binding to reduced graphene oxide for a stable high-capacity lithium-ion battery anode
Source: Royal Society of Chemistry journal article supplement (doi:10.1039/c6ta07274g), 2016-01-01
Supplement: c6ta07274g1.pdf [file c6ta07274g1.pdf]

## Carbon-coated Si micrometer particles binding to reduced graphene oxide for a stable high-capacity lithium ion battery anode

Xiang Han,<sup>†</sup> Huixin Chen,<sup>‡</sup> Ziqi Zhang,<sup>†</sup> Donglin Huang,<sup>†</sup> Jianfang Xu,<sup>†</sup> Cheng Li,<sup>†</sup> Songyan Chen,<sup>\*\*†</sup> and Yong Yang<sup>\*\*</sup>

<sup>†</sup>Fujian Provincial Key Laboratory of Semiconductors and Applications, Collaborative Innovation Center for Optoelectronic Semiconductors and Efficient Devices, Department of Physics, Xiamen University, Xiamen361005, P. R. China

E-mail: [syichen@xmu.edu.cn](mailto:syichen@xmu.edu.cn)

<sup>‡</sup>State Key Laboratory for Physical Chemistry of Solid Surfaces, Department of Chemistry, Xiamen University, Xiamen361005, P. R. China

E-mail: [yyang@xmu.edu.cn](mailto:yyang@xmu.edu.cn)

### Supporting Information

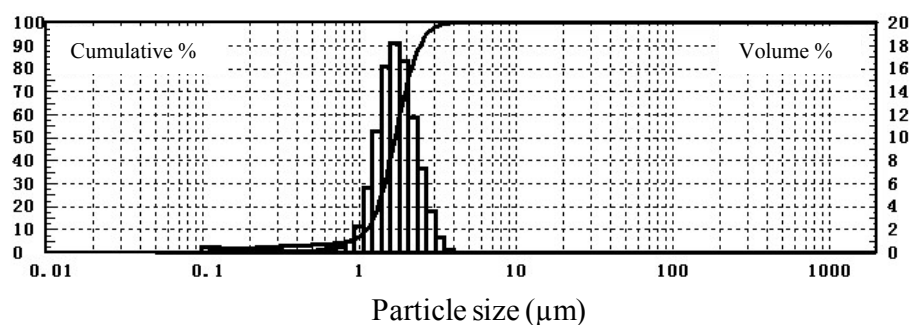

Figure S1. Particle size distribution of micron-sized Si particles.

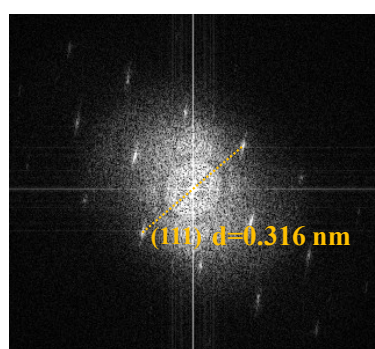

Figure S2. FFT patterns of the HRTEM image in Fig. 1d.

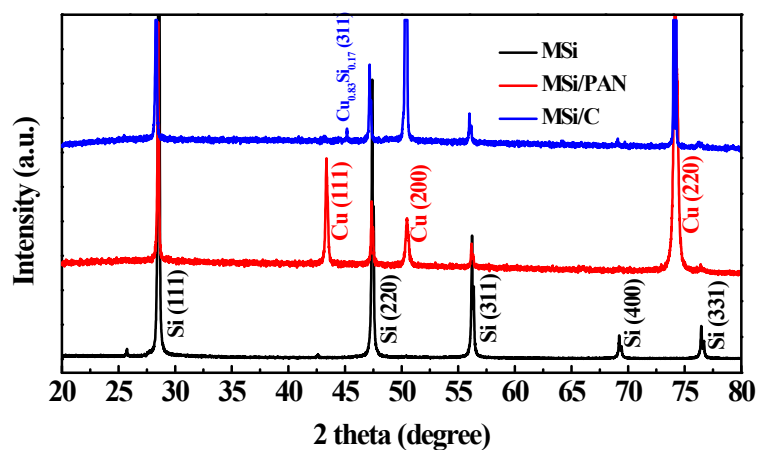

Figure S3. XRD patterns of MSi, MSi/PAN, and MSi/C.

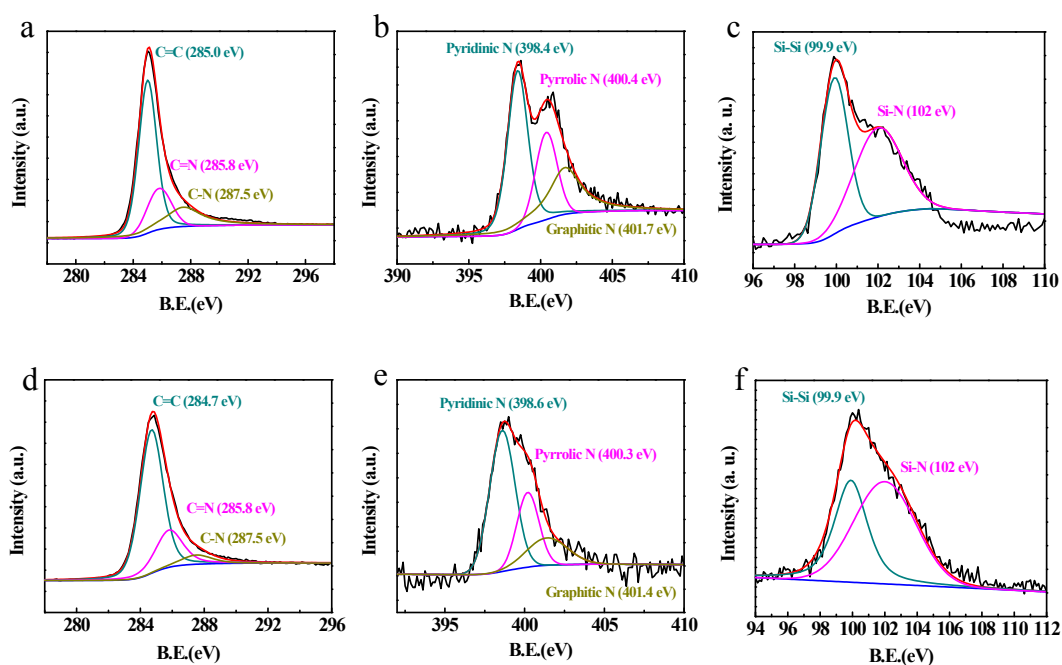

Figure S3. Fitting XPS spectra of MSi/C: (a) C 1s, (b) N 1s, (c) Si 2p and fitting XPS spectra of MSi/C/RGO: (d) C 1s, (e) N 1s, (f) Si 2p.

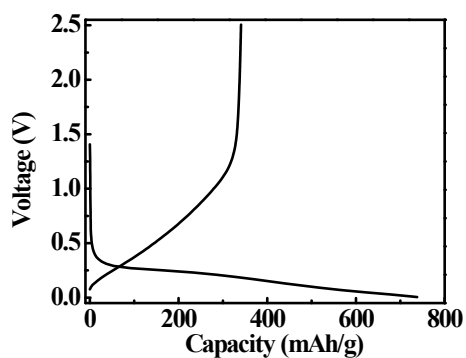

Figure S5. The first cycle voltage profile of amorphous carbon at  $0.2 \text{ A g}^{-1}$  between 0.005-2.5 V.

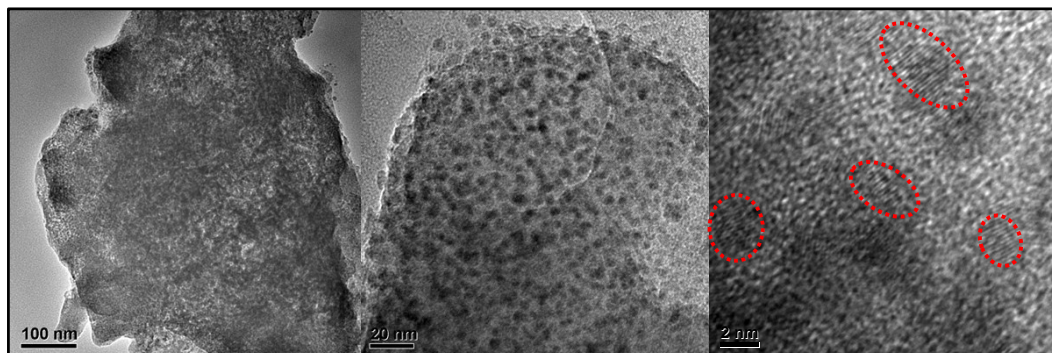

Figure S6. TEM images of MSi/C after 100 cycles at  $0.2 \text{ A g}^{-1}$  between 0.005-2.5 V.
